# Supplementary material for: Evaluating the Scalability of the ProMuscle Intervention for Community-Dwelling Older Adults: A Mixed Methods Study
Source: Research Square preprint supplement (doi:10.21203/rs.3.rs-7156488/v1), 2025-07-29

**Readiness questions in online survey**

**Q1:** Do you believe sarcopenia among older adults should be a priority for scaling the ProMuscle intervention to address sarcopenia? *(Please select one option)*

- Not at all
- To a very small extent
- A little
- To a large extent
- Not applicable (i.e., cannot be answered based on the information available)

Could you elaborate your answer? *(Please type your response below – your feedback is highly appreciated)*


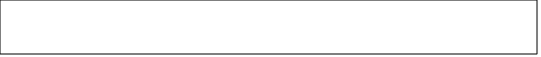


**Q2:** Do you think the outcomes of the ProMuscle intervention, such as addressing sarcopenia, meet the needs of the target group (adults aged 65 and older)? *(Please select one option)*

- Not at all
- To a very small extent
- A little
- To a large extent
- Not applicable (i.e., cannot be answered based on the information available)

Could you elaborate your answer? *(Please type your response below – your feedback is highly appreciated)*


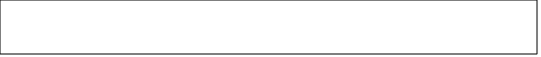


**Q3:** To what extent does addressing sarcopenia through the ProMuscle intervention align with policies from government and/or municipalities? *(Please select one option)*

- Not at all
- To a very small extent
- A little
- To a large extent
- Not applicable (i.e., cannot be answered based on the information available)

Could you elaborate your answer? *(Please type your response below – your feedback is highly appreciated)*


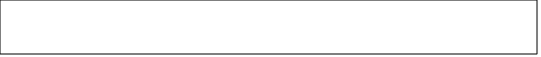


**Q4:** Do you believe scaling ProMuscle would be strategically useful to funders and/or funding agencies? *(Please select one option)*

- Not at all
- To a very small extent
- A little
- To a large extent
- Not applicable (i.e., cannot be answered based on the information available)

Could you elaborate your answer? *(Please type your response below – your feedback is highly appreciated)*


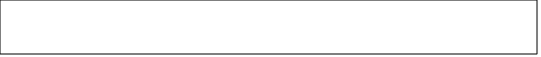


**Q5:** Based on the available evidence of ProMuscle, do you believe it is effective in addressing sarcopenia in adults aged 65 and older? *(Please select one option)*

- Not at all
- To a very small extent
- A little
- To a large extent
- Not applicable (i.e., cannot be answered based on the information available)

Could you elaborate your answer? *(Please type your response below – your feedback is highly appreciated)*


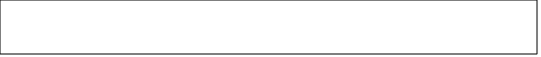


**Q6:** Based on the evidence available, do you believe the benefits of the ProMuscle intervention outweigh the costs? *(Please select one option)*

- Not at all
- To a very small extent
- A little
- To a large extent
- Not applicable (i.e., cannot be answered based on the information available)

Could you elaborate your answer? *(Please type your response below – your feedback is highly appreciated)*


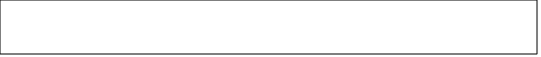


**Q7:** Do you think core components (protein intake increase & strength training) of ProMuscle will consistently produce the same effects as seen in the literature when ProMuscle is scaled up? *(Please select one option)*

- Not at all
- To a very small extent
- A little
- To a large extent
- Not applicable (i.e., cannot be answered based on the information available)

Could you elaborate your answer? *(Please type your response below – your feedback is highly appreciated)*


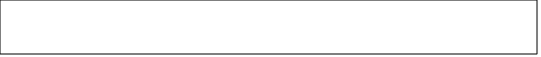


**Q8:** If the core components (protein intake increase & strength training) of ProMuscle are adjusted during scale up compared to the original intervention, do you expect the impact of these adjustments to be favourable? *(Please select one option)*

- Not at all
- To a very small extent
- A little
- To a large extent
- Not applicable (i.e., cannot be answered based on the information available)

Could you elaborate your answer? *(Please type your response below – your feedback is highly appreciated)*


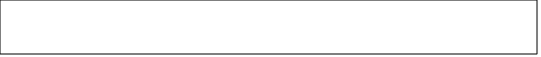


**Q9:** To what extent can it be monitored and/or maintained whether ProMuscle is being implemented as intended if the intervention is scaled up? *(Please select one option)*

- Not at all
- To a very small extent
- A little
- To a large extent
- Not applicable (i.e., cannot be answered based on the information available)

Could you elaborate your answer? *(Please type your response below – your feedback is highly appreciated)*


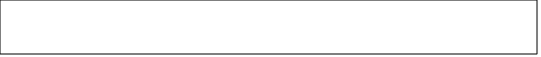


**Q10:** Do you think ProMuscle in its current form has the potential to reach the target group (adults aged 65 and older) at scale? *(Please select one option)*

- Not at all
- To a very small extent
- A little
- To a large extent
- Not applicable (i.e., cannot be answered based on the information available)

Could you elaborate your answer? *(Please type your response below – your feedback is highly appreciated)*


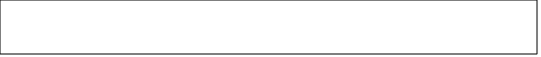


**Q11:** Do you think ProMuscle will be acceptable to the target group (adults aged 65 and older) when scaled up? *(Please select one option)*

- Not at all
- To a very small extent
- A little
- To a large extent
- Not applicable (i.e., cannot be answered based on the information available)

Could you elaborate your answer? *(Please type your response below – your feedback is highly appreciated)*


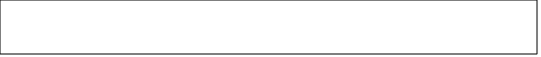


**Q12:** Are primary care physiotherapy and dietitian practices an appropriate setting to offer ProMuscle on a larger scale? *(Please select one option)*

- Not at all
- To a very small extent
- A little
- To a large extent
- Not applicable (i.e., cannot be answered based on the information available)

Could you elaborate your answer? *(Please type your response below – your feedback is highly appreciated)*


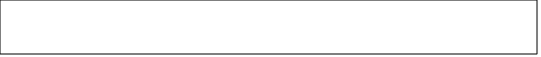


**Q13:** Are physical therapists and dietitians the appropriate healthcare professionals to deliver ProMuscle at scale? *(Please select one option)*

- Not at all
- To a very small extent
- A little
- To a large extent
- Not applicable (i.e., cannot be answered based on the information available)

Could you elaborate your answer? *(Please type your response below – your feedback is highly appreciated)*


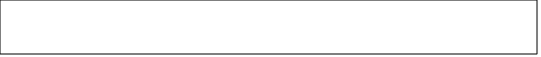


**Q14:** Are there other healthcare professionals who could deliver ProMuscle?


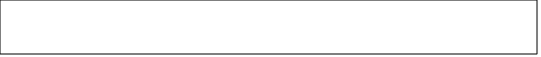


**Q15:** Do you believe ProMuscle aligns with the current capabilities of primary care and its professionals to deliver ProMuscle on a large scale? *(Please select one option)*

- Not at all
- To a very small extent
- A little
- To a large extent
- Not applicable (i.e., cannot be answered based on the information available)

Could you elaborate your answer? *(Please type your response below – your feedback is highly appreciated)*


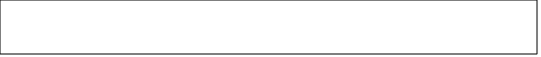


**Q16:** How likely is it that integrating ProMuscle into existing organizational, municipal, and policy structures is feasible? *(Please select one option)*

- Not at all
- To a very small extent
- A little
- To a large extent
- Not applicable (i.e., cannot be answered based on the information available)

Could you elaborate your answer? *(Please type your response below – your feedback is highly appreciated)*


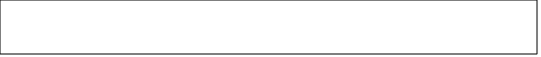


**Q17:** Do you think it is feasible to offer ProMuscle on a larger scale using the current implementation infrastructure? *(Please select one option)*

- Not at all
- To a very small extent
- A little
- To a large extent
- Not applicable (i.e., cannot be answered based on the information available)

Could you elaborate your answer? *(Please type your response below – your feedback is highly appreciated)*


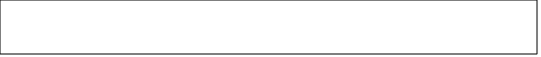


**Q18:** Is the level of integration of ProMuscle into delivery settings required for implementation at scale sustainable? *(Please select one option)*

- Not at all
- To a very small extent
- A little
- To a large extent
- Not applicable (i.e., cannot be answered based on the information available)

Could you elaborate your answer? *(Please type your response below – your feedback is highly appreciated)*


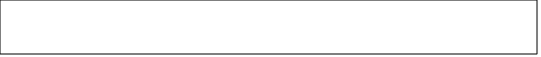


**Q19:** Is the level of co-financing or national funding necessary to implement ProMuscle at scale sustainable? *(Please select one option)*

- Not at all
- To a very small extent
- A little
- To a large extent
- Not applicable (i.e., cannot be answered based on the information available)

Could you elaborate your answer? *(Please type your response below – your feedback is highly appreciated)*


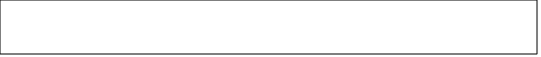


**Q20:** To what extent is it possible to sustainably upscale the current approach of ProMuscle? *(Please select one option)*

- Not at all
- To a very small extent
- A little
- To a large extent
- Not applicable (i.e., cannot be answered based on the information available)

Could you elaborate your answer? *(Please type your response below – your feedback is highly appreciated)*


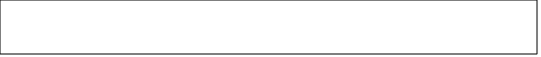

Supplement: Supplementary file 3 [file fcf0060b6900aebdf5520895.docx]
