# Supplementary material for: Evaluating the Scalability of the ProMuscle Intervention for Community-Dwelling Older Adults: A Mixed Methods Study
Source: Research Square preprint supplement (doi:10.21203/rs.3.rs-7156488/v1), 2025-07-29
Supplement: Supplementary file 1 [file 00109b54dfe30d6cb03ff91f.docx]

**Summary of scalability assessment**

| **Domains** | **Summary** | **Overall score** |
| --- | --- | --- |
| Domain A1: The problem | The effectiveness and need for the intervention to improve muscle strength and protein intake in older adults are assessed as positive. The added value of ProMuscle and its potential for further implementation are considered significant. In particular, aging is highlighted as an important factor. It is indicated that the prevention of sarcopenia is desirable and will have positive effects on healthy aging, quality of life, and unnecessary healthcare costs. Opportunities are seen to link ProMuscle to fall prevention, as this topic is now much more prominently addressed by both older adults and the government, municipalities, and organizations. | 3.0 |
| Domain A2: The intervention | The ProMuscle intervention is described as effective and distinctive. The collaboration between the dietitian and the physical therapist is unique. It offers a good combination of nutrition and exercise in primary care, which is accessible and not too complex for participants. However, it is noted that older adults are still insufficiently aware of the consequences of sarcopenia and therefore do not fully recognize or appreciate the necessity of addressing it. To improve awareness, alternative framing can be considered, such as focusing on staying active and independent. | 3.0 |
| Domain A3: Strategic/political context | There is a lack of support from politics and/or municipalities, partly due to the focus on fall prevention. Knowledge about sarcopenia is lacking, which means the outcomes of ProMuscle are not reflected in prevention policies. As a result, there is a lack of (financial) support. It is suggested that shifting the focus from a single condition (sarcopenia) to promoting healthy aging could generate more attention and acceptance. Currently, it is unclear who is responsible for this prevention and, consequently, who should financially contribute to the implementation and scaling up of ProMuscle. | 2.0 |
| Domain A4: Evidence of effectiveness | ProMuscle has been found to be effective and is supported by multiple organizations. The added value and the impact of ProMuscle on various outcomes (reducing fall risk, enabling longer independent living, improving quality of life, etc.) are described positively. The expectation that the outcomes of the intervention will reduce healthcare costs in the long term is still not widely highlighted and has not yet been proven. Finally, the intervention is considered applicable to a broad target group. In this, flexibility, individualized tailoring, and the social aspects of the intervention are crucial, but monitoring and long-term evaluation are necessary for success and widespread acceptance. | 3.0 |
| Domain A5: Intervention costs and benefits | ProMuscle is seen as an intervention that can provide numerous health benefits and potentially reduce healthcare costs. However, the costs for participation are currently often covered by the participants themselves, which means that the group of 65 years and older individuals with a low socioeconomic status is not being reached. Financial support through funding or collaborations with municipalities is often used to address this. Therefore, securing funding and reaching the full target group are considered essential in order to achieve the greatest possible cost-effectiveness. | 3.0 |
| Domain B1: Fidelity and adaptation | The current description of ProMuscle is considered reliable. Adjustments in areas such as frequency or group size are not deemed desirable, and their effects have not been demonstrated. If adjustments are necessary for further scale up, participants indicate that these should first be studied. Potential differences in outcomes is expected when ProMuscle is offered by different providers. It is considered important that providers of ProMuscle receive training. Additionally, monitoring and evaluation is found to be necessary to ensure quality is maintained. | 2.3 |
| Domain B2: Reach and acceptability | ProMuscle is described by participants as an intervention that can be widely accepted. However, motivation among individuals aged 65 years and older and financing are seen as barriers. Public communication and campaigns may help reach the right target group and raise awareness among the population. | 2.5 |
| Domain B3: Delivery settings and workforce | There is discussion about implementing ProMuscle in various settings and by different professionals. However, adjusting the program may be necessary to further scale the intervention. Opportunities are seen, for example, in gyms or rehabilitation centers, in collaboration with fitness trainers, lifestyle coaches, and sports coaches. Scaling up to other settings presents challenges such as reimbursements and referrals, but it is emphasized that these professionals must possess sufficient knowledge. Therefore, concerns exist regarding funding, required expertise, and acceptance within existing structures. | 2.5 |
| Domain B4: Implementation infrastructure | Long-term success depends on constant attention and involvement from all parties. A structured approach is needed, with support from regional, provincial, and national governments. Difficulties in scaling up ProMuscle are mainly anticipated in maintaining accessibility and affordability of the program. The need for collaboration between professionals, municipalities, and health insurers is frequently mentioned. | 2.0 |
| Domain B5: Sustainability | Funding is considered essential for the success and scaling of ProMuscle. Health insurers must be involved to secure structural funding for successful implementation. Furthermore, collaboration with local professionals and organizations in both the healthcare and welfare sectors is deemed necessary for further scaling. This may also help raise awareness of the added value of the program. Finally, the required investment in time, materials, and motivation from healthcare professionals is mentioned as a barrier. | 2.3 |
