# Supplementary material for: Evaluating the Scalability of the ProMuscle Intervention for Community-Dwelling Older Adults: A Mixed Methods Study
Source: Research Square preprint supplement (doi:10.21203/rs.3.rs-7156488/v1), 2025-07-29
Supplement: Supplementary file 2 [file dd32d06efc24cbf381c1965e.docx]

**Interview Guide for scaling ProMuscle**

*Introduction*

1. Are you familiar with ProMuscle?
   1. How did you hear about ProMuscle?

*Suitability for nationwide implementation*

1. How does ProMuscle compare to other existing interventions targeting similar areas (such as sarcopenia, and healthy aging)?
   1. Ask for an example
   2. Probe further for their perspective
2. Do you think ProMuscle is suitable for nationwide implementation in the Netherlands?
   1. If yes, why do you think so?
   2. If no, what are the barriers?
3. Are there aspects that you believe need to be adjusted for ProMuscle to be implemented on a broader scale?
   1. If yes, what should be adjusted?
   2. How would these changes affect the outcomes of ProMuscle?
   3. Are there specific factors that are essential for offering ProMuscle in other regions?

*ProMuscle methodology*

1. Should and, or could ProMuscle’s approach change if implemented nationwide?
   1. Would other professionals be involved? If yes, what roles would they play?
   2. Who should deliver ProMuscle?
   3. What types of support or resources would these professionals need to support implementation of ProMuscle?
2. Should and, or could ProMuscle’s referral process change if implemented nationwide?
   1. What support of resourced are needed for professionals in this process?
3. ProMuscle is currently mainly implemented in primary care. If scaled up, could ProMuscle be implemented in other settings?
   1. Ask for an example

*Requirements for successful scale-up*

1. What does ProMuscle need to be successfully scaled up?
   1. What barriers or facilitators do you foresee?
   2. What are the challenges, and how could they be addressed? (e.g., funding, positioning in the healthcare landscape, reimbursement, responsibilities).
   3. What kind of support would be necessary to offer ProMuscle in other locations or organizations? (e.g., research, policies, financing, municipal support).

*From Regional to National scaling*

1. ProMuscle is currently offered regionally. What do you think the timeline would look like for scaling up from a regional to a national level?
   1. What factors influence this timeline?
2. If we aim for nationwide implementation, how can we ensure ProMuscle is delivered as intended?
   1. Provide examples if needed (e.g., website or licensing system)
   2. How do we maintain the quality of ProMuscle?
3. What is needed to ensure ProMuscle’s long-term sustainability?
   1. Will significant, initial or ongoing, resource commitments be required?
   2. Is ProMuscle’s current method (in terms of delivery and financial structure) sustainable enough?

*Conditions for successful scaling*

1. What are the key prerequisites for successfully scaling up ProMuscle?
2. Do you think there is a strong foundation for scaling up ProMuscle?
   1. If yes, what are the strengths and, or positive aspects?
   2. If no, what is still missing?
